# Supplementary material for: A Simple, Non-Invasive Score to Predict Paroxysmal Atrial Fibrillation
Source: PLOS journal article supplement (doi:10.1371/journal.pone.0163621), 2016-09-28
Supplement: S7 (10.1371/journal.pone.0163621.s007) [file journal.pone.0163621.s007]

**S3 Table. Classification performance of logistic models reduced to significant parameters.**

| <b>pAF vs. SR</b>                                                                                                                                                |                      |                      |
|------------------------------------------------------------------------------------------------------------------------------------------------------------------|----------------------|----------------------|
| logistic model with 10 variables<br>(age, aortic root, left atrium, LV ESD, sleep apnea, hyperlipidemia,<br>beta blocker, catheter ablation, TDI A', heart rate) |                      |                      |
| AUC                                                                                                                                                              | 0.79 (0.75, 0.84)    |                      |
| Sensitivity                                                                                                                                                      | Specificity          | Accuracy             |
| 70% (62.0%, 78.1%)                                                                                                                                               | 73.5% (78.7%, 68.3%) | 73.0% (71.0%, 75.0%) |
| 80% (72.7%, 87.3%)                                                                                                                                               | 64.4% (70.1%, 58.8%) | 67.0% (65.2%, 68.7%) |
| 90% (84.5%, 95.5%)                                                                                                                                               | 48.0% (55.2%, 40.0%) | 54.5% (52.9%, 56.1%) |
| <b>cAF vs. SR</b>                                                                                                                                                |                      |                      |
| logistic model with 6 variables<br>(age, left atrium, LV EF, platelet inhibitor, TDI A', QT interval)                                                            |                      |                      |
| AUC                                                                                                                                                              | 0.93 (0.91, 0.96)    |                      |
| Sensitivity                                                                                                                                                      | Specificity          | Accuracy             |
| 70% (61.5%, 79.0%)                                                                                                                                               | 94.2% (96.5%, 92.0%) | 93.0% (91.1%, 94.0%) |
| 80% (71.3%, 88.7%)                                                                                                                                               | 92.0% (94.3%, 92.0%) | 91.0% (89.4%, 92.7%) |
| 90% (84.2%, 95.8%)                                                                                                                                               | 80.3% (84.1%, 76.4%) | 81.0% (79.8%, 82.3%) |

For logistic models that were reduced to significant parameters, used to classify between pAF and SR or between cAF and SR, specificity and classification accuracy values at 70%, 80% and 90% sensitivity are given. In brackets, 95% confidence intervals are indicated that were estimated by 100-fold cross-validation.
